# Supplementary material for: Association between the triglyceride-glucose index and 1-year major adverse cardiovascular events in patients with coronary heart disease and hypertension
Source: PubMed Central journal article supplement (PMC10633928; doi:10.1186/s12933-023-02018-9), 2023-11-08
Supplement: 12933_2023_2018_MOESM1_ESM.pdf [file 12933_2023_2018_MOESM1_ESM.pdf]

## Additional file 1

**Table S1** The main baseline characteristics for eligible patients according to the TyG quartiles

| Indicators                        | Q1≤8.48              | 8.48<Q2≤8.85         | 8.85<Q3≤9.18         | Q4>9.18              | P value |
|-----------------------------------|----------------------|----------------------|----------------------|----------------------|---------|
| N                                 | 205                  | 213                  | 191                  | 201                  |         |
| TyG                               | 8.26 (8.08, 8.4)     | 8.71 (8.59, 8.78)    | 9.02 (8.95, 9.1)     | 9.47 (9.3, 9.74)     | <0.001  |
| Male (n, %)                       | 158 (77.07)          | 127 (59.62)          | 139 (72.77)          | 147 (73.13)          | 0.001   |
| Age (years)                       | 69 (60, 75.5)        | 67 (56.5, 73)        | 66 (57, 75)          | 63 (56, 71)          | 0.009   |
| BMI (kg/m <sup>2</sup> )          | 24.68 (22.85, 26.42) | 24.39 (23.03, 27.55) | 25.39 (23.39, 27.47) | 25.86 (23.88, 27.98) | <0.001  |
| SBP (mmHg)                        | 134 (122, 148)       | 133 (120, 146.5)     | 134 (122, 149)       | 140 (129, 154.5)     | <0.001  |
| DBP (mmHg)                        | 79 (69, 86)          | 77 (68, 84)          | 78 (69, 86)          | 81 (72, 89)          | 0.001   |
| HR (bpm)                          | 72 (66, 80)          | 70 (67, 78)          | 73 (68, 80)          | 76 (70, 83)          | <0.001  |
| Smoking (n, %)                    | 83 (40.49)           | 80 (37.56)           | 98 (51.31)           | 97 (48.26)           | 0.017   |
| Drinking (n, %)                   | 42 (20.49)           | 43 (20.19)           | 55 (28.8)            | 57 (28.36)           | 0.058   |
| Case history (n, %)               |                      |                      |                      |                      |         |
| Diabetes                          | 70 (34.15)           | 102 (47.89)          | 91 (47.64)           | 140 (69.65)          | <0.001  |
| CKD <sup>a</sup>                  | 25 (12.2)            | 22 (10.33)           | 33 (17.28)           | 34 (16.92)           | 0.110   |
| OMI                               | 31 (15.12)           | 28 (13.15)           | 48 (25.13)           | 44 (21.89)           | 0.005   |
| Family history of CVDs            | 56 (27.32)           | 65 (30.52)           | 73 (38.22)           | 64 (31.84)           | 0.128   |
| Number of coronary lesions (n, %) |                      |                      |                      |                      |         |
| One-vessel disease                | 161 (78.54)          | 172 (80.75)          | 155 (81.15)          | 141 (70.15)          | 0.027   |
| Two-vessel disease                | 34 (16.59)           | 36 (16.9)            | 25 (13.09)           | 51 (25.37)           | 0.012   |
| Multi-vessel disease              | 10 (4.88)            | 5 (2.35)             | 11 (5.76)            | 9 (4.48)             | 0.375   |
| Cardiovascular medications (n, %) |                      |                      |                      |                      |         |
| Anti-platelet                     | 205 (100)            | 213 (100)            | 190 (99.48)          | 201 (100)            | 0.236   |
| Statins                           | 204 (99.51)          | 208 (97.65)          | 187 (97.91)          | 197 (98.01)          | 0.508   |
| ACEI/ARB                          | 139 (67.8)           | 145 (68.08)          | 129 (67.54)          | 139 (69.15)          | 0.987   |
| β-blockers                        | 150 (73.17)          | 162 (76.06)          | 147 (76.96)          | 154 (76.62)          | 0.803   |
| CCB                               | 75 (36.59)           | 92 (43.19)           | 74 (38.74)           | 103 (51.24)          | 0.016   |
| Nitrates                          | 70 (34.15)           | 76 (35.68)           | 53 (27.75)           | 52 (25.87)           | 0.088   |
| Laboratory variables              |                      |                      |                      |                      |         |
| TC (mmol/L)                       | 3.62 (2.86, 4.12)    | 3.67 (3.18, 4.48)    | 3.99 (3.25, 5.05)    | 4.45 (3.63, 5.45)    | <0.001  |
| TG (mmol/L)                       | 0.88 (0.77, 1.06)    | 1.29 (1.12, 1.46)    | 1.77 (1.52, 1.98)    | 2.32 (1.87, 3.11)    | <0.001  |
| LDL-C (mmol/L)                    | 2.13 (1.61, 2.5)     | 2.17 (1.83, 2.68)    | 2.34 (1.84, 3.1)     | 2.63 (2.07, 3.18)    | <0.001  |
| HDL-C (mmol/L)                    | 1.04 (0.88, 1.23)    | 1 (0.9, 1.17)        | 0.94 (0.76, 1.1)     | 0.97 (0.79, 1.11)    | <0.001  |
| HCY (μmol/L)                      | 14.18 (11.55, 17.35) | 12.6 (10.96, 16.18)  | 15.03 (11.68, 20.65) | 14.18 (11.98, 18.82) | <0.001  |
| Hs-CRP (mg/L)                     | 2.36 (1, 5.7)        | 2.1 (0.99, 5.7)      | 3.12 (1.14, 5.7)     | 2.64 (1.44, 5.7)     | 0.182   |
| Scr (μmol/L)                      | 79 (67.55, 92.05)    | 72.4 (59.25, 85.65)  | 77.2 (64.5, 94.7)    | 74.3 (61.45, 89.8)   | 0.001   |
| FBG (mmol/L)                      | 5.2 (4.76, 5.85)     | 5.82 (5.15, 6.37)    | 5.92 (5.25, 6.99)    | 7.1 (6.14, 8.98)     | <0.001  |
| HbA1c (%)                         | 5.9 (5.6, 6.3)       | 6.1 (5.75, 6.8)      | 6.4 (5.9, 7.2)       | 7 (5.9, 8.3)         | <0.001  |
| PAD indicators                    |                      |                      |                      |                      |         |
| baPWV (m/s)                       | 16.25 (15.27, 21.29) | 16.16 (14.97, 20)    | 20.55 (16.33, 23.67) | 18.92 (15.44, 23.21) | <0.001  |
| ABI                               | 1.12 (0.96, 1.18)    | 1.14 (1.01, 1.19)    | 0.99 (0.89, 1.14)    | 1.01 (0.88, 1.15)    | <0.001  |
| FMD (%)                           | 7.1 (6.1, 8.1)       | 7.1 (6.3, 8.3)       | 6.3 (5.8, 7.5)       | 6.5 (5.9, 7.7)       | <0.001  |
| Echocardiography                  |                      |                      |                      |                      |         |
| LAD (mm)                          | 37 (35, 40)          | 38 (36, 40)          | 38 (36, 40)          | 38 (36, 41)          | 0.032   |
| LVDd (mm)                         | 51 (48, 54)          | 50 (47, 54)          | 51.19 (49, 54)       | 51 (48, 54)          | 0.029   |
| IVST (mm)                         | 10 (9, 11)           | 10 (9, 11)           | 10 (10, 12)          | 11 (10, 12)          | <0.001  |
| PWT (mm)                          | 9 (8, 9.13)          | 9 (8, 10)            | 9 (8, 10)            | 10 (9, 10)           | <0.001  |
| LVEF (%)                          | 65 (62, 69)          | 66 (60, 70.5)        | 64 (58, 69)          | 64 (60, 70)          | 0.366   |

TyG, triglyceride-glucose; Q1, quartile 1; Q2, quartile 2; Q3, quartile 3; Q4, quartile 4; BMI, body mass index; SBP, systolic blood pressure; DBP, diastolic blood pressure; HR, heart rate; CKD, chronic kidney disease; OMI, old myocardial infarction; CVD, cardiovascular disease; ACEI, angiotensin converting enzyme inhibitor; ARB, angiotensin receptor blocker; CCB, calcium channel blockers; TC, total cholesterol; TG, triglyceride; LDL-C, low-density lipoprotein cholesterol; HDL-C, high-density lipoprotein cholesterol; HCY, homocysteine; Hs-CRP, hypersensitive C-reactive protein; Scr, serum creatinine; FBG, fasting blood glucose; HbA1c, glycosylated hemoglobin; PAD, peripheral artery disease; baPWV, brachial-ankle pulse wave velocity; ABI, ankle-brachial index; FMD,

brachial artery flow-mediated vasodilatation; LAD, left atrial diameter; LVDD, left ventricular end-diastolic diameter; IVST, interventricular septal thickness; PWT, left ventricular posterior wall thickness; LVEF, left ventricular ejection fraction  
<sup>a</sup> Defined as eGFR < 60 ml/min/1.73 m<sup>2</sup> on the basis of The KDIGO CKD Clinical Guideline

**Table S2** Collinearity diagnostics among the variables

| Indicators                 | VIF   |
|----------------------------|-------|
| Gender                     | 1.878 |
| Age                        | 1.785 |
| BMI                        | 1.349 |
| SBP                        | 1.667 |
| DBP                        | 1.910 |
| HR                         | 1.328 |
| Smoking                    | 1.901 |
| Drinking                   | 1.532 |
| Case history               |       |
| Diabetes                   | 1.669 |
| CKD <sup>a</sup>           | 1.465 |
| OMI                        | 1.263 |
| Family history of CVDs     | 1.145 |
| Number of coronary lesions | 1.104 |
| Cardiovascular medications |       |
| Anti-platelet              | 1.063 |
| Statins                    | 1.035 |
| ACEI/ARB                   | 1.137 |
| $\beta$ -blockers          | 1.113 |
| CCB                        | 1.177 |
| Nitrates                   | 1.114 |
| Laboratory variables       |       |
| TC                         | 1.356 |
| TG                         | 5.685 |
| LDL-C                      | 1.510 |
| HDL-C                      | 1.081 |
| HCY                        | 1.394 |
| Hs-CRP                     | 1.123 |
| Scr                        | 1.427 |
| FBG                        | 3.292 |
| HbA1c                      | 2.331 |
| TyG                        | 7.905 |
| PAD indicators             |       |
| baPWV                      | 2.636 |
| ABI                        | 2.591 |
| FMD                        | 1.613 |
| Echocardiography           |       |
| LAD                        | 1.675 |
| LVDD                       | 2.186 |
| IVST                       | 1.987 |
| PWT                        | 1.896 |
| LVEF                       | 1.828 |

VIF, variance inflation factor; TyG, triglyceride-glucose; BMI, body mass index; SBP, systolic blood pressure; DBP, diastolic blood pressure; HR, heart rate; CKD, chronic kidney disease; OMI, old myocardial infarction; CVD, cardiovascular disease; ACEI, angiotensin converting enzyme inhibitor; ARB, angiotensin receptor blocker; CCB, calcium channel blockers; TC, total cholesterol; TG, triglyceride; LDL-C, low-density lipoprotein cholesterol; HDL-C, high-density lipoprotein cholesterol; HCY, homocysteine; Hs-CRP, hypersensitive C-reactive protein; Scr, serum creatinine; FBG, fasting blood glucose; HbA1c, glycosylated hemoglobin; PAD, peripheral artery disease; baPWV, brachial-ankle pulse wave velocity; ABI, ankle-brachial index; FMD, brachial artery flow-mediated vasodilatation; LAD, left atrial diameter; LVDD, left ventricular end-diastolic diameter; IVST, interventricular septal thickness; PWT, left ventricular posterior wall thickness; LVEF, left ventricular ejection fraction

<sup>a</sup> Defined as eGFR < 60 ml/min/1.73 m<sup>2</sup> on the basis of The KDIGO CKD Clinical Guideline

No potentially significant collinearity is defined as VIF less than 10 among variables
